# Supplementary material for: The Notch pathway promotes the cancer stem cell characteristics of CD90+ cells in hepatocellular carcinoma
Source: PubMed Central journal article supplement (PMC4891057; doi:10.18632/oncotarget.6672), 2015-12-19
Supplement: oncotarget-07-9525-s001.pdf [file oncotarget-07-9525-s001.pdf]

## SUPPLEMENTARY FIGURES AND TABLES

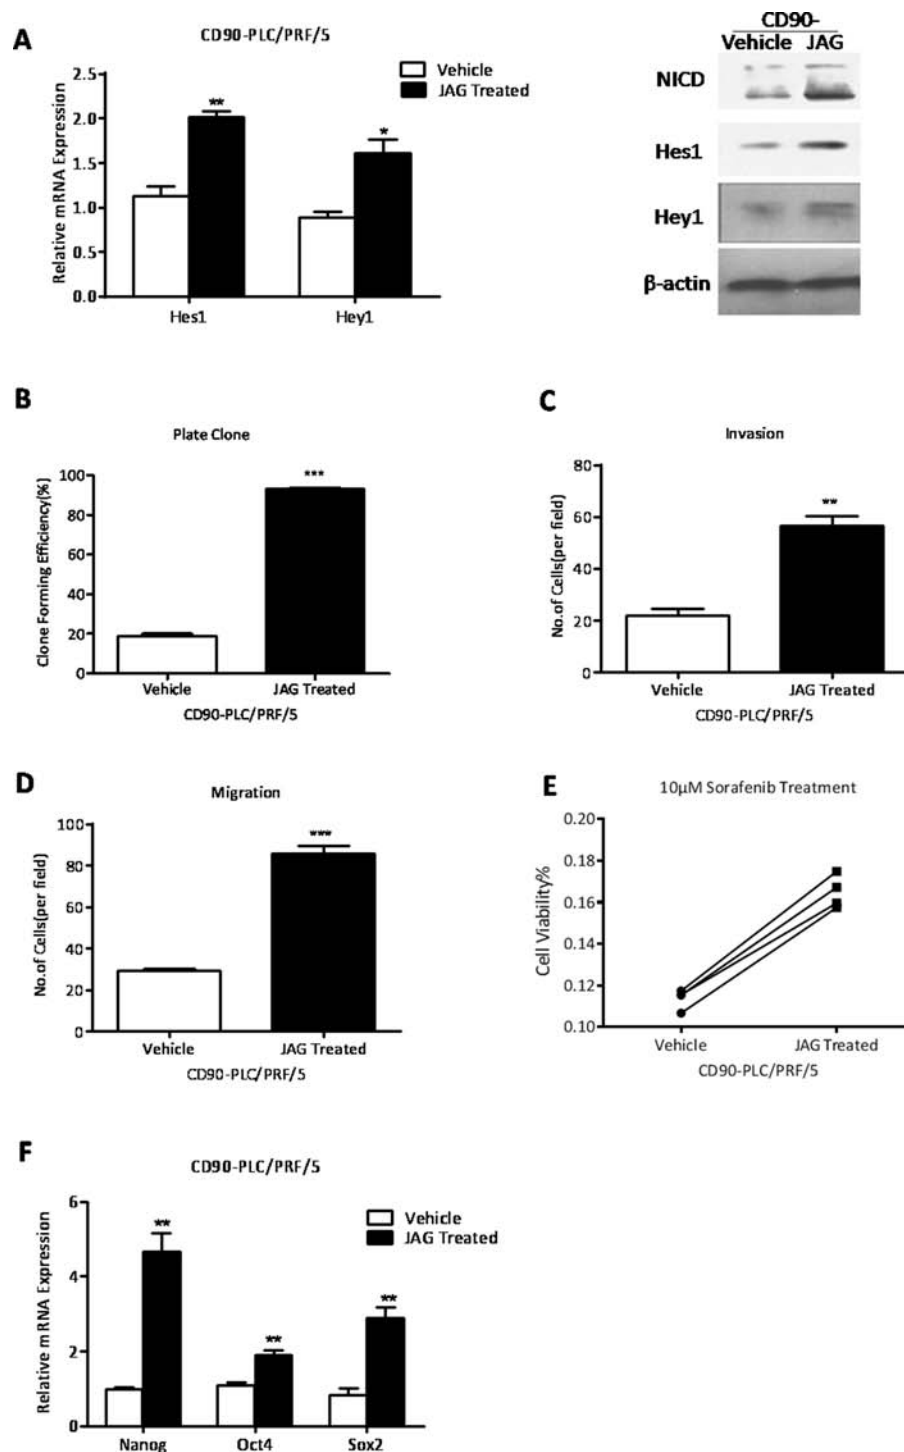

**Supplementary Figure S1: CD90<sup>+</sup> cells possessed characteristics of cancer stem cells after Notch signaling activated by Jagged1.** The core components of Notch signaling in CD90<sup>+</sup> cells could be increased by human recombinant protein Jagged1 (Supplementary Fig. 1A). With the overexpression of NICD, we found the capacity of colony formation, invasion and migration in CD90<sup>+</sup> cells was elevated following activation of Notch pathway (Supplementary Fig. 1B, 1C, 1D). Treated with 10 µM Sorafenib CD90<sup>+</sup> cells displayed promoted viability following NICD overexpression (Supplementary Fig. 1E). In addition, Nanog, Sox2 and Oct4 were also enhanced in expression levels detected by qRT-PCR (Supplementary Fig. 1F).

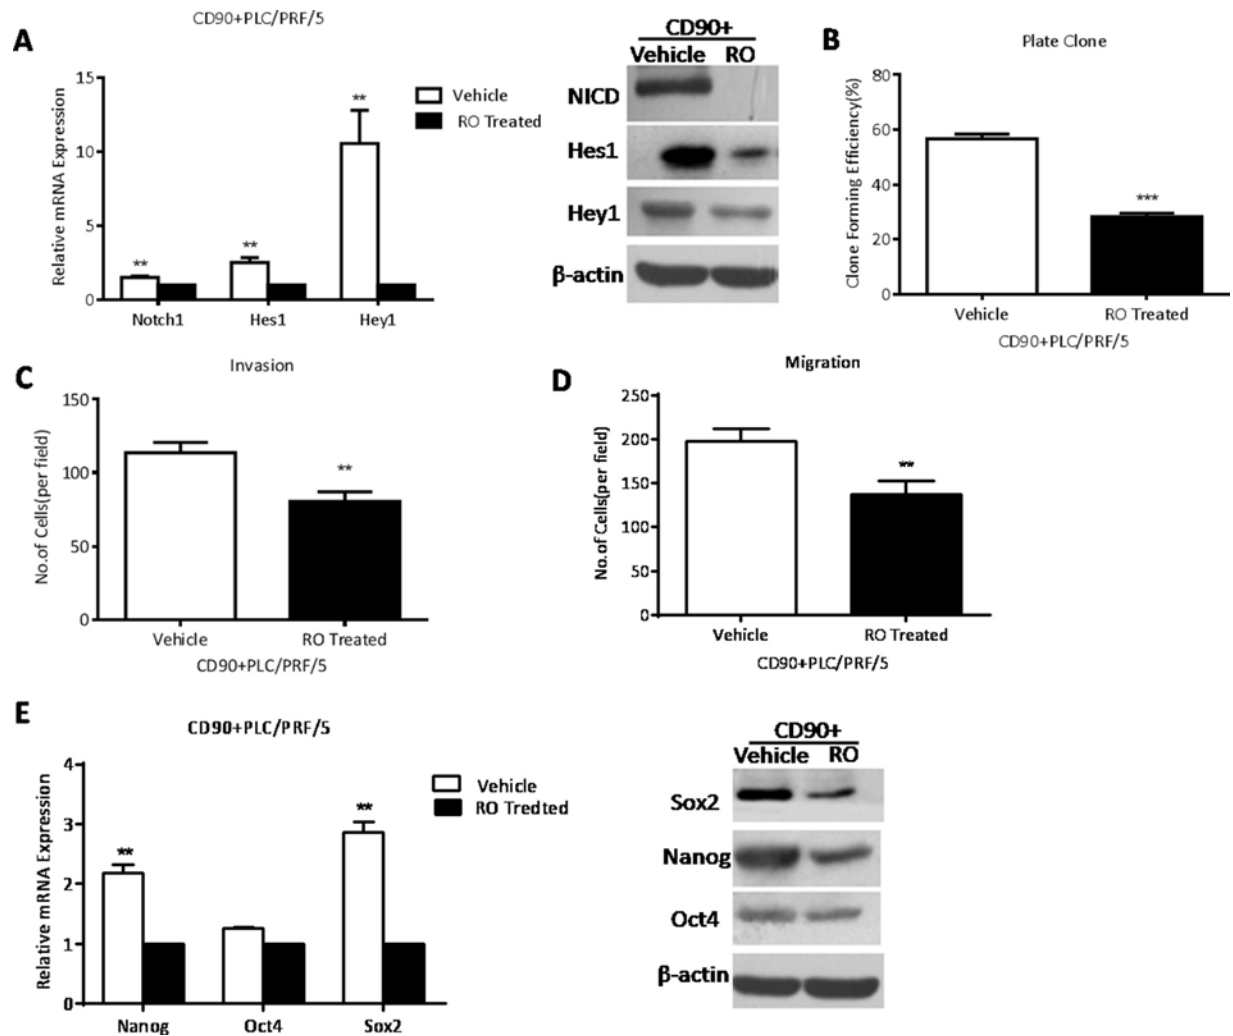

**Supplementary Figure S2: The inhibition of Notch pathway by RO4929097 attenuated cancer stem cell characteristics of CD90<sup>+</sup> cells.** RO4929097, as the  $\gamma$ -secretase inhibitor, could downregulate the Notch pathway in CD90<sup>+</sup> cells as shown in Supplementary Fig. 2A. Accompanied with decreasing NICD, CD90<sup>+</sup> cells showed presented the declining capacity of colony formation, migration and invasion (Supplementary Fig. 2B, 2C, 2D), and embryonic stem cell-associated markers (Nanog, Sox2) in CD90<sup>+</sup> cells was also reduced after treated with RO4929097 (Supplementary Fig. 2E). However, there was no change in expression of Oct4.

**Supplementary Table S1: Tumorigenic capacity of CD90<sup>+</sup> cells from HCC cell lines**

| Cell Lines | Phenotypes        | No. of Injected Cells | Tumor Incidence* | Latency(days)** |
|------------|-------------------|-----------------------|------------------|-----------------|
| PLC/PRF/5  | CD90 <sup>+</sup> | 2×10 <sup>3</sup>     | 2/3              | 20              |
|            |                   | 1×10 <sup>4</sup>     | 2/3              | 15              |
|            |                   | 5×10 <sup>4</sup>     | 3/3              | 7               |
|            | CD90 <sup>-</sup> | 2×10 <sup>3</sup>     | 0/3              | -               |
|            |                   | 1×10 <sup>4</sup>     | 0/3              | -               |
|            |                   | 5×10 <sup>4</sup>     | 0/3              | -               |
| Huh-7      | CD90 <sup>+</sup> | 1×10 <sup>3</sup>     | 0/3              | -               |
|            |                   | 2×10 <sup>3</sup>     | 1/3              | 10              |
|            |                   | 1×10 <sup>4</sup>     | 3/3              | 8               |
|            | CD90 <sup>-</sup> | 1×10 <sup>3</sup>     | 0/3              | -               |
|            |                   | 2×10 <sup>3</sup>     | 0/3              | -               |
|            |                   | 1×10 <sup>4</sup>     | 0/3              | -               |

\*No. of mice with tumor formation/no. of mice injected.

\*\*Approximate no. of days from cells injection to appearance of the tumor.

**Supplementary Table S2: Tumorigenic capacity of CD90<sup>+</sup>/CD90<sup>-</sup> cells from PLC/PRF/5 after the inhibition or activation of Notch pathway**

| Phenotypes                      | No. of Injected Cells | Tumor Incidence* | Latency(days)** |
|---------------------------------|-----------------------|------------------|-----------------|
| CD90 <sup>+</sup> +Vehicle      | 2×10 <sup>3</sup>     | 0/3              | -               |
|                                 | 1×10 <sup>4</sup>     | 0/3              | -               |
|                                 | 5×10 <sup>4</sup>     | 1/3              | 36              |
|                                 | 1×10 <sup>5</sup>     | 3/3              | 28              |
| CD90 <sup>+</sup> +Lv-Notch1-si | 2×10 <sup>3</sup>     | 0/3              | -               |
|                                 | 1×10 <sup>4</sup>     | 0/3              | -               |
|                                 | 5×10 <sup>4</sup>     | 0/3              | -               |
|                                 | 1×10 <sup>5</sup>     | 0/3              | -               |
| CD90 <sup>-</sup> +Vehicle      | 1×10 <sup>5</sup>     | 0/3              | -               |
|                                 | 2×10 <sup>5</sup>     | 0/3              | -               |
|                                 | 5×10 <sup>5</sup>     | 1/3              | 70              |
|                                 | 1×10 <sup>6</sup>     | 1/3              | 63              |
| CD90 <sup>-</sup> +Lv-NICD      | 1×10 <sup>5</sup>     | 2/3              | 67              |
|                                 | 2×10 <sup>5</sup>     | 2/3              | 56              |
|                                 | 5×10 <sup>5</sup>     | 2/3              | 44              |
|                                 | 1×10 <sup>6</sup>     | 2/3              | 37              |

\*No. of mice with tumor formation/no. of mice injected.

\*\*Approximate no. of days from cells injection to appearance of the tumor.

**Supplementary Table S3: Primer sequences for quantitative RT-PCR analysis**

| Gene           | GENE ID. | Primer sequences (5'-3')                            | Product length |
|----------------|----------|-----------------------------------------------------|----------------|
| Sox2           | 6657     | F:GCCCTGCAGTACAACCTCCAT<br>R:GACTTGACCACCGAACCCAT   | 110            |
| Oct4           | 5460     | F:CTTGAATCCCGAATGGAAAGGG<br>R:GACTTGACCACCGAACCCAT  | 111            |
| Nanog          | 79923    | F:GTCCCAAAGGCAAACAACCC<br>R:GCTGGGTGGAAGAGAACACA    | 108            |
| CD90           | 7070     | F:ACTGCCGCCATGAGAATACC<br>R:CTGGTGAAGTTGGTTCGGGA    | 136            |
| MDR1           | 5243     | F:CCCATCATTGCAATAGCAGG<br>R:GTTCAAACCTCTGCTCCTGA    | 157            |
| GSTP1          | 2950     | F:TGGTGGACATGGTGAATGAC<br>R:ATCTGGTCTCCACAATGAAG    | 181            |
| LRP            | 9961     | F:GGATGTCAAGACCGGAAAGGT<br>R:TCTTTCTCCACGGACTTCGT   | 80             |
| Hes1           | 3280     | F:GCTAAGGTGTTTGGAGGCT<br>R:CCGCTGTTGCTGGTGTA        | 122            |
| Notch1         | 4851     | F:CCGCAGTTGTGCTCCTGAA<br>R:ACCTTGGCGGTCTCGTAGCT     | 109            |
| Hey1           | 23462    | F:GTTTCGGCTCTAGGTTCCATGT<br>CGTCGGCGCTTCTCAATTATTC  | 88             |
| $\beta$ -actin | 60       | F:GTTGCGTTACACCCTTTCTTG<br>R:GACTGCTGTCACCTTCACCGT  | 157            |
| CyclinD1       | 595      | F: GCTGCGAAGTGGAACCATC<br>R: CCTCCTTCTGCACACATTTGAA | 135            |
| CyclinE1       | 898      | F:GCCAGCCTTGGGACAATAATG<br>R:CTTGCACGTTGAGTTTGGGT   | 104            |
| CDK2           | 1017     | F:GTACCTCCCCTGGATGAAGAT<br>R:CGAAATCCGCTTGTTAGGGTC  | 75             |
| CDK6           | 1021     | F:CCAGATGGCTCTAACCTCAGT<br>R:AACTTCCACGAAAAAGAGGCTT | 152            |
| E2F1           | 1869     | F:ACGTGACGTGTCAGGACCT<br>R:GATCGGGCCTTGTTTGCTCTT    | 146            |

F: Forward; R: Reverse.
